# Supplementary material
Source: PubMed Central journal article supplement (PMC5516887)
Supplement: NIHMS876078-supplement-4.pdf [file NIHMS876078-supplement-4.pdf]

Table S3. Process gene ontologies with significant enrichment in the gene sets with differential methylation.

| GOID       | TERM                                                           | Corrected p-value |            |             |
|------------|----------------------------------------------------------------|-------------------|------------|-------------|
|            |                                                                | ETBF epithelium   | Mock tumor | ETBF tumors |
| GO:0048568 | embryonic organ development                                    |                   |            | 7.69E-11    |
| GO:0048562 | embryonic organ morphogenesis                                  |                   |            | 2.13E-10    |
| GO:0048598 | embryonic morphogenesis                                        |                   |            | 3.44E-09    |
| GO:0030851 | granulocyte differentiation                                    |                   | 1.35E-04   | 1.24E-08    |
| GO:0048513 | animal organ development                                       |                   | 1.80E-04   | 1.63E-08    |
| GO:1903707 | negative regulation of hemopoiesis                             |                   | 2.04E-04   | 1.83E-08    |
| GO:0009888 | tissue development                                             |                   | 2.74E-04   | 2.88E-08    |
| GO:0045646 | regulation of erythrocyte differentiation                      |                   | 2.93E-04   | 4.51E-08    |
| GO:0048731 | system development                                             |                   | 7.76E-05   | 4.71E-08    |
| GO:0032774 | RNA biosynthetic process                                       |                   | 3.86E-04   | 5.86E-08    |
| GO:0006355 | regulation of transcription, DNA-templated                     |                   | 1.22E-03   | 2.24E-07    |
| GO:1903506 | regulation of nucleic acid-templated transcription             |                   | 2.01E-03   | 5.99E-07    |
| GO:0051252 | regulation of RNA metabolic process                            |                   | 2.17E-03   | 6.43E-07    |
| GO:2001141 | regulation of RNA biosynthetic process                         |                   | 1.30E-04   | 1.13E-06    |
| GO:0048534 | hematopoietic or lymphoid organ development                    |                   |            | 1.21E-06    |
| GO:0009887 | animal organ morphogenesis                                     |                   | 6.62E-03   | 3.03E-06    |
| GO:0006351 | transcription, DNA-templated                                   |                   |            | 3.40E-06    |
| GO:0002682 | regulation of immune system process                            |                   |            | 4.25E-06    |
| GO:0097659 | nucleic acid-templated transcription                           |                   | 7.35E-04   | 4.93E-06    |
| GO:0042471 | ear morphogenesis                                              |                   |            | 6.89E-06    |
| GO:0007275 | multicellular organism development                             |                   | 8.03E-04   | 7.55E-06    |
| GO:0048469 | cell maturation                                                |                   | 7.81E-05   | 8.53E-06    |
| GO:0030097 | hemopoiesis                                                    |                   |            | 8.71E-06    |
| GO:0002520 | immune system development                                      |                   |            | 9.47E-06    |
| GO:1903706 | regulation of hemopoiesis                                      |                   |            | 9.49E-06    |
| GO:0042127 | regulation of cell proliferation                               |                   |            | 1.38E-05    |
| GO:2000112 | regulation of cellular macromolecule biosynthetic process      |                   | 4.98E-04   | 1.72E-05    |
| GO:0044707 | single-multicellular organism process                          |                   | 1.18E-03   | 2.05E-05    |
| GO:0048856 | anatomical structure development                               |                   | 1.89E-06   | 3.35E-05    |
| GO:0030099 | myeloid cell differentiation                                   |                   | 1.73E-03   | 3.85E-05    |
| GO:0044767 | single-organism developmental process                          |                   | 7.74E-05   | 3.93E-05    |
| GO:0033599 | regulation of mammary gland epithelial cell proliferation      |                   | 2.76E-03   | 4.19E-05    |
| GO:0042472 | inner ear morphogenesis                                        |                   | 2.22E-03   | 4.77E-05    |
| GO:0048518 | positive regulation of biological process                      |                   | 1.17E-04   | 4.91E-05    |
| GO:0032502 | developmental process                                          |                   |            | 7.02E-05    |
| GO:0002683 | negative regulation of immune system process                   |                   |            | 1.03E-04    |
| GO:0048522 | positive regulation of cellular process                        |                   |            | 1.04E-04    |
| GO:0032609 | interferon-gamma production                                    |                   |            | 1.29E-04    |
| GO:0010556 | regulation of macromolecule biosynthetic process               |                   |            | 1.43E-04    |
| GO:0034654 | nucleobase-containing compound biosynthetic process            |                   | 6.07E-05   | 1.71E-04    |
| GO:0018130 | heterocycle biosynthetic process                               |                   |            | 1.83E-04    |
| GO:0019438 | aromatic compound biosynthetic process                         |                   |            | 2.07E-04    |
| GO:1901362 | organic cyclic compound biosynthetic process                   |                   |            | 2.39E-04    |
| GO:0048706 | embryonic skeletal system development                          |                   | 2.31E-03   | 2.47E-04    |
| GO:0001501 | skeletal system development                                    |                   |            | 3.56E-04    |
| GO:0034645 | cellular macromolecule biosynthetic process                    |                   |            | 3.91E-04    |
| GO:0048704 | embryonic skeletal system morphogenesis                        |                   |            | 4.51E-04    |
| GO:0022008 | neurogenesis                                                   |                   |            | 4.75E-04    |
| GO:0007399 | nervous system development                                     | 3.29E-03          |            | 4.97E-04    |
| GO:0048468 | cell development                                               |                   | 1.85E-04   | 5.22E-04    |
| GO:0010468 | regulation of gene expression                                  | 7.06E-03          | 1.48E-03   | 5.47E-04    |
| GO:0048699 | generation of neurons                                          |                   |            | 6.05E-04    |
| GO:0051321 | meiotic cell cycle                                             |                   |            | 6.22E-04    |
| GO:0048869 | cellular developmental process                                 |                   |            | 6.43E-04    |
| GO:0016070 | RNA metabolic process                                          |                   | 1.02E-04   | 7.06E-04    |
| GO:0009653 | anatomical structure morphogenesis                             |                   | 1.65E-04   | 7.06E-04    |
| GO:0030154 | cell differentiation                                           |                   |            | 7.51E-04    |
| GO:1903046 | meiotic cell cycle process                                     |                   |            | 8.04E-04    |
| GO:0007126 | meiotic nuclear division                                       |                   | 1.09E-04   | 8.05E-04    |
| GO:0007129 | synapsis                                                       |                   | 1.95E-03   | 8.13E-04    |
| GO:0022414 | reproductive process                                           |                   |            | 1.22E-03    |
| GO:0000003 | reproduction                                                   |                   |            | 1.48E-03    |
| GO:0009059 | macromolecule biosynthetic process                             |                   |            | 1.55E-03    |
| GO:0030182 | neuron differentiation                                         |                   |            | 1.67E-03    |
| GO:0019219 | regulation of nucleobase-containing compound metabolic process |                   |            | 1.72E-03    |

|            |                                                                         |          |          |
|------------|-------------------------------------------------------------------------|----------|----------|
| GO:0050808 | synapse organization                                                    |          | 1.78E-03 |
| GO:0031326 | regulation of cellular biosynthetic process                             |          | 1.96E-03 |
| GO:0007268 | chemical synaptic transmission                                          |          | 1.96E-03 |
| GO:0098916 | anterograde trans-synaptic signaling                                    |          | 2.06E-03 |
| GO:0099536 | synaptic signaling                                                      |          | 2.11E-03 |
| GO:0099537 | trans-synaptic signaling                                                |          | 2.15E-03 |
| GO:0043009 | chordate embryonic development                                          |          | 2.25E-03 |
| GO:0090304 | nucleic acid metabolic process                                          | 1.36E-06 | 2.48E-03 |
| GO:0009792 | embryo development ending in birth or egg hatching                      |          | 2.56E-03 |
| GO:0051171 | regulation of nitrogen compound metabolic process                       |          | 2.67E-03 |
| GO:0034587 | piRNA metabolic process                                                 |          | 2.76E-03 |
| GO:0009889 | regulation of biosynthetic process                                      |          | 2.77E-03 |
| GO:0016043 | cellular component organization                                         |          | 2.83E-03 |
| GO:0050804 | modulation of synaptic transmission                                     |          | 2.98E-03 |
| GO:0048666 | neuron development                                                      |          | 3.08E-03 |
| GO:0044260 | cellular macromolecule metabolic process                                |          | 3.14E-03 |
| GO:0045143 | homologous chromosome segregation                                       |          | 4.16E-03 |
| GO:0010467 | gene expression                                                         |          | 4.25E-03 |
| GO:0044702 | single organism reproductive process                                    |          | 4.34E-03 |
| GO:0007127 | meiosis I                                                               |          | 4.38E-03 |
| GO:0007267 | cell-cell signaling                                                     |          | 5.49E-03 |
| GO:0000122 | negative regulation of transcription from RNA polymerase II promoter    |          | 5.73E-03 |
| GO:0003002 | regionalization                                                         |          | 6.40E-03 |
| GO:0006357 | regulation of transcription from RNA polymerase II promoter             | 1.35E-03 | 6.87E-03 |
| GO:0006366 | transcription from RNA polymerase II promoter                           |          | 8.57E-03 |
| GO:0007389 | pattern specification process                                           |          | 8.79E-03 |
| GO:0044249 | cellular biosynthetic process                                           | 9.69E-07 |          |
| GO:0044271 | cellular nitrogen compound biosynthetic process                         | 1.82E-06 |          |
| GO:0045165 | cell fate commitment                                                    | 8.85E-06 |          |
| GO:0045595 | regulation of cell differentiation                                      | 5.20E-05 |          |
| GO:0045596 | negative regulation of cell differentiation                             | 2.04E-04 |          |
| GO:0045892 | negative regulation of transcription, DNA-templated                     | 3.89E-04 |          |
| GO:0045893 | positive regulation of transcription, DNA-templated                     | 4.58E-04 |          |
| GO:0045934 | negative regulation of nucleobase-containing compound metabolic process | 4.74E-04 |          |
| GO:0045944 | positive regulation of transcription from RNA polymerase II promoter    | 4.87E-04 |          |
| GO:0048523 | negative regulation of cellular process                                 | 5.27E-04 |          |
| GO:0048705 | skeletal system morphogenesis                                           | 1.08E-03 |          |
| GO:0051093 | negative regulation of developmental process                            | 1.69E-03 |          |
| GO:0051216 | cartilage development                                                   | 1.69E-03 |          |
| GO:0051253 | negative regulation of RNA metabolic process                            | 1.69E-03 |          |
| GO:0051254 | positive regulation of RNA metabolic process                            | 1.69E-03 |          |
| GO:0060255 | regulation of macromolecule metabolic process                           | 2.48E-03 |          |
| GO:0060429 | epithelium development                                                  | 4.74E-03 |          |
| GO:0061448 | connective tissue development                                           | 5.11E-03 |          |
| GO:0090596 | sensory organ morphogenesis                                             | 5.45E-03 |          |
| GO:1901576 | organic substance biosynthetic process                                  | 5.68E-03 |          |
| GO:1902679 | negative regulation of RNA biosynthetic process                         | 5.87E-03 |          |
| GO:1902680 | positive regulation of RNA biosynthetic process                         | 6.20E-03 |          |
| GO:1903507 | negative regulation of nucleic acid-templated transcription             | 7.46E-03 |          |
| GO:1903508 | positive regulation of nucleic acid-templated transcription             | 7.47E-03 |          |
| GO:2000113 | negative regulation of cellular macromolecule biosynthetic process      | 8.84E-03 |          |
