# Supplementary material
Source: PubMed Central journal article supplement (PMC5516887)
Supplement: NIHMS876078-supplement-5.pdf [file NIHMS876078-supplement-5.pdf]

## Heatmap OTUs

| OTU | OTU | Taxonomy                         | superkingdom | phylum       | class          | order          | family         | genus                         |
|-----|-----|----------------------------------|--------------|--------------|----------------|----------------|----------------|-------------------------------|
| 1   | 1   | Bacteria; Bacteroidetes; Bacter  | Bacteria     | Bacteroidete | Bacteroidia    | Bacteroidales  | Rikenellaceae  | Alisities                     |
| 2   | 2   | Bacteria; Bacteroidetes; Bacter  | Bacteria     | Bacteroidete | Bacteroidia    | Bacteroidales  | Bacteroidaceae | Bacteroides                   |
| 3   | 3   | Bacteria; Bacteroidetes; Bacter  | Bacteria     | Bacteroidete | Bacteroidia    | Bacteroidales  | Bacteroidaceae | Bacteroides                   |
| 4   | 6   | Bacteria; Firmicutes; Clostridia | Bacteria     | Firmicutes   | Clostridia     | Clostridiales  | Clostridiaceae | Clostridium sensu stricto 1   |
| 5   | 7   | Bacteria; Firmicutes; Clostridia | Bacteria     | Firmicutes   | Clostridia     | Clostridiales  | Lachnospirac   | uncultured                    |
| 6   | 10  | Bacteria; Bacteroidetes; Bacter  | Bacteria     | Bacteroidete | Bacteroidia    | Bacteroidales  | Porphyromon    | Parabacteroides               |
| 7   | 11  | Bacteria; Firmicutes; Erysipelot | Bacteria     | Firmicutes   | Erysipelotrici | Erysipelotrici | Erysipelotrici | Turcibacter                   |
| 8   | 13  | Bacteria; Bacteroidetes; Bacter  | Bacteria     | Bacteroidete | Bacteroidia    | Bacteroidales  | Rikenellaceae  | Alisities                     |
| 9   | 15  | Bacteria; Firmicutes; Clostridia | Bacteria     | Firmicutes   | Clostridia     | Clostridiales  | Lachnospirac   | uncultured                    |
| 10  | 16  | Bacteria; Verrucomicrobia; Ver   | Bacteria     | Verrucomicr  | Verrucomicr    | Verrucomicr    | Verrucomicr    | Akkermansia                   |
| 11  | 17  | Bacteria; Firmicutes; Clostridia | Bacteria     | Firmicutes   | Clostridia     | Clostridiales  | Clostridiales  | -NA                           |
| 12  | 24  | Bacteria; Firmicutes; Clostridia | Bacteria     | Firmicutes   | Clostridia     | Clostridiales  | Ruminococca    | Ruminococcaceae UCG-014       |
| 13  | 25  | Bacteria; Firmicutes; Clostridia | Bacteria     | Firmicutes   | Clostridia     | Clostridiales  | Clostridiales  | -NA                           |
| 14  | 26  | Bacteria; Bacteroidetes; Bacter  | Bacteria     | Bacteroidete | Bacteroidia    | Bacteroidales  | Porphyromon    | Odoribacter                   |
| 15  | 36  | Bacteria; Firmicutes; Clostridia | Bacteria     | Firmicutes   | Clostridia     | Clostridiales  | Lachnospirac   | Coproccoccus 1                |
| 16  | 48  | Bacteria; Verrucomicrobia; Ver   | Bacteria     | Verrucomicr  | Verrucomicr    | Verrucomicr    | Verrucomicr    | Akkermansia                   |
| 17  | 55  | Bacteria; Firmicutes; Clostridia | Bacteria     | Firmicutes   | Clostridia     | Clostridiales  | Lachnospirac   | uncultured                    |
| 18  | 57  | Bacteria; Firmicutes; Clostridia | Bacteria     | Firmicutes   | Clostridia     | Clostridiales  | Lachnospirac   | uncultured                    |
| 19  | 60  | Bacteria; Firmicutes; Clostridia | Bacteria     | Firmicutes   | Clostridia     | Clostridiales  | Lachnospirac   | Roseburia                     |
| 20  | 61  | Bacteria; Firmicutes; Clostridia | Bacteria     | Firmicutes   | Clostridia     | Clostridiales  | Ruminococca    | Ruminiclostridium 9           |
| 21  | 62  | Bacteria; Firmicutes; Clostridia | Bacteria     | Firmicutes   | Clostridia     | Clostridiales  | Ruminococca    | Oscillibacter                 |
| 22  | 63  | Bacteria; Firmicutes; Clostridia | Bacteria     | Firmicutes   | Clostridia     | Clostridiales  | Lachnospirac   | Lachnospiraceae UCG-008       |
| 23  | 65  | Bacteria; Firmicutes; Clostridia | Bacteria     | Firmicutes   | Clostridia     | Clostridiales  | Lachnospirac   | Lachnospiraceae NK4A136 group |
| 24  | 68  | Bacteria; Firmicutes; Clostridia | Bacteria     | Firmicutes   | Clostridia     | Clostridiales  | Ruminococca    | Oscillibacter                 |
| 25  | 71  | Bacteria; Bacteroidetes; Bacter  | Bacteria     | Bacteroidete | Bacteroidia    | Bacteroidales  | Rikenellaceae  | Alisities                     |
| 26  | 74  | Bacteria; Firmicutes; Clostridia | Bacteria     | Firmicutes   | Clostridia     | Clostridiales  | Clostridiales  | unidentified                  |
| 27  | 76  | Bacteria; Firmicutes; Clostridia | Bacteria     | Firmicutes   | Clostridia     | Clostridiales  | Lachnospirac   | uncultured                    |
| 28  | 82  | Bacteria; Firmicutes; Clostridia | Bacteria     | Firmicutes   | Clostridia     | Clostridiales  | Lachnospirac   | uncultured                    |
| 29  | 91  | Bacteria; Firmicutes; Clostridia | Bacteria     | Firmicutes   | Clostridia     | Clostridiales  | Lachnospirac   | Roseburia                     |
| 30  | 94  | Bacteria; Firmicutes; Clostridia | Bacteria     | Firmicutes   | Clostridia     | Clostridiales  | Clostridiales  | -NA                           |
| 31  | 96  | Bacteria; Firmicutes; Clostridia | Bacteria     | Firmicutes   | Clostridia     | Clostridiales  | Ruminococca    | uncultured                    |
| 32  | 103 | Bacteria; Firmicutes; Clostridia | Bacteria     | Firmicutes   | Clostridia     | Clostridiales  | Lachnospirac   | Lachnospiraceae NK4A136 group |
| 33  | 113 | Bacteria; Firmicutes; Clostridia | Bacteria     | Firmicutes   | Clostridia     | Clostridiales  | Lachnospirac   | Lachnospirac                  |
| 34  | 114 | Bacteria; Firmicutes; Clostridia | Bacteria     | Firmicutes   | Clostridia     | Clostridiales  | Ruminococca    | uncultured                    |
| 35  | 119 | Bacteria; Firmicutes; Clostridia | Bacteria     | Firmicutes   | Clostridia     | Clostridiales  | Lachnospirac   | uncultured                    |
| 36  | 121 | Bacteria; Firmicutes; Clostridia | Bacteria     | Firmicutes   | Clostridia     | Clostridiales  | Lachnospirac   | uncultured                    |
| 37  | 122 | Bacteria; Firmicutes; Clostridia | Bacteria     | Firmicutes   | Clostridia     | Clostridiales  | Lachnospirac   | Tyzzeria                      |
| 38  | 124 | Bacteria; Firmicutes; Clostridia | Bacteria     | Firmicutes   | Clostridia     | Clostridiales  | Lachnospirac   | uncultured                    |
| 39  | 130 | Bacteria; Firmicutes; Clostridia | Bacteria     | Firmicutes   | Clostridia     | Clostridiales  | Lachnospirac   | uncultured                    |
| 40  | 133 | Bacteria; Firmicutes; Clostridia | Bacteria     | Firmicutes   | Clostridia     | Clostridiales  | Lachnospirac   | uncultured                    |
| 41  | 137 | Bacteria; Firmicutes; Clostridia | Bacteria     | Firmicutes   | Clostridia     | Clostridiales  | Lachnospirac   | Lachnospiraceae UCG-001       |
| 42  | 140 | Bacteria; Firmicutes; Clostridia | Bacteria     | Firmicutes   | Clostridia     | Clostridiales  | Lachnospirac   | uncultured                    |
| 43  | 150 | Bacteria; Firmicutes; Clostridia | Bacteria     | Firmicutes   | Clostridia     | Clostridiales  | Ruminococca    | Ruminiclostridium 9           |
| 44  | 152 | Bacteria; Firmicutes; Clostridia | Bacteria     | Firmicutes   | Clostridia     | Clostridiales  | Lachnospirac   | uncultured                    |
| 45  | 181 | Bacteria; Firmicutes; Clostridia | Bacteria     | Firmicutes   | Clostridia     | Clostridiales  | Lachnospirac   | Lachnospiraceae NK4A136 group |
| 46  | 183 | Bacteria; Firmicutes; Clostridia | Bacteria     | Firmicutes   | Clostridia     | Clostridiales  | Ruminococca    | Ruminiclostridium             |
| 47  | 191 | Bacteria; Firmicutes; Clostridia | Bacteria     | Firmicutes   | Clostridia     | Clostridiales  | Lachnospirac   | uncultured                    |
| 48  | 198 | Bacteria; Firmicutes; Clostridia | Bacteria     | Firmicutes   | Clostridia     | Clostridiales  | Ruminococca    | Anaerotruncus                 |
| 49  | 202 | Bacteria; Firmicutes; Clostridia | Bacteria     | Firmicutes   | Clostridia     | Clostridiales  | Ruminococca    | uncultured                    |
| 50  | 204 | Bacteria; Firmicutes; Erysipelot | Bacteria     | Firmicutes   | Erysipelotrici | Erysipelotrici | Erysipelotrici | Allobaculum                   |
| 51  | 209 | Bacteria; Firmicutes; Clostridia | Bacteria     | Firmicutes   | Clostridia     | Clostridiales  | Lachnospirac   | uncultured                    |
| 52  | 215 | Bacteria; Firmicutes; Clostridia | Bacteria     | Firmicutes   | Clostridia     | Clostridiales  | Ruminococca    | Anaerotruncus                 |
| 53  | 233 | Bacteria; Firmicutes; Erysipelot | Bacteria     | Firmicutes   | Erysipelotrici | Erysipelotrici | Erysipelotrici | Allobaculum                   |
| 54  | 242 | Bacteria; Firmicutes; Clostridia | Bacteria     | Firmicutes   | Clostridia     | Clostridiales  | Lachnospirac   | Lachnospiraceae FCS020 group  |
| 55  | 255 | Bacteria; Firmicutes; Clostridia | Bacteria     | Firmicutes   | Clostridia     | Clostridiales  | Ruminococca    | Oscillibacter                 |
| 56  | 259 | Bacteria; Firmicutes; Clostridia | Bacteria     | Firmicutes   | Clostridia     | Clostridiales  | Ruminococca    | uncultured                    |
| 57  | 263 | Bacteria; Firmicutes; Clostridia | Bacteria     | Firmicutes   | Clostridia     | Clostridiales  | Lachnospirac   | Coproccoccus 1                |
| 58  | 278 | Bacteria; Firmicutes; Clostridia | Bacteria     | Firmicutes   | Clostridia     | Clostridiales  | Lachnospirac   | uncultured                    |
| 59  | 287 | Bacteria; Firmicutes; Clostridia | Bacteria     | Firmicutes   | Clostridia     | Clostridiales  | Lachnospirac   | uncultured                    |
| 60  | 291 | Bacteria; Firmicutes; Clostridia | Bacteria     | Firmicutes   | Clostridia     | Clostridiales  | Ruminococca    | uncultured                    |
| 61  | 316 | Bacteria; Firmicutes; Clostridia | Bacteria     | Firmicutes   | Clostridia     | Clostridiales  | Ruminococca    | Ruminiclostridium 9           |
| 62  | 335 | Bacteria; Firmicutes; Clostridia | Bacteria     | Firmicutes   | Clostridia     | Clostridiales  | Lachnospirac   | Lachnospiraceae UCG-008       |
| 63  | 336 | Bacteria; Firmicutes; Clostridia | Bacteria     | Firmicutes   | Clostridia     | Clostridiales  | Lachnospirac   | uncultured                    |
| 64  | 361 | Bacteria; Firmicutes; Clostridia | Bacteria     | Firmicutes   | Clostridia     | Clostridiales  | Ruminococca    | Ruminiclostridium 9           |
| 65  | 417 | Bacteria; Firmicutes; Clostridia | Bacteria     | Firmicutes   | Clostridia     | Clostridiales  | Lachnospirac   | uncultured                    |
